# Supplementary material
Source: PubMed Central journal article supplement (PMC7980399)
Supplement: pnas.2023500118.sapp.pdf [file pnas.2023500118.sapp.pdf]

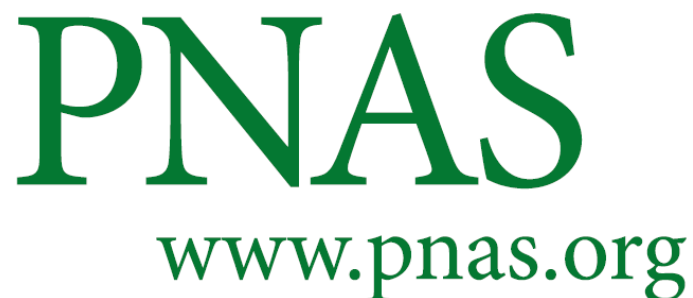

**Supplementary Information for:**

**Quantification of *Brucella abortus* population structure in a natural host**

Aretha Fiebig<sup>1</sup>, Catherine E. Vrentas<sup>2</sup>, Thien Le<sup>3</sup>, Marianne Huebner<sup>3</sup>, Paola M. Boggiatto<sup>2</sup>, Steven C. Olsen<sup>2</sup>, Sean Crosson<sup>1</sup>

<sup>1</sup>Department of Microbiology and Molecular Genetics, Michigan State University, East Lansing, MI, 48824, USA

<sup>2</sup>Infectious Bacterial Diseases Research Unit, National Animal Disease Center, Agricultural Research Service, U.S. Department of Agriculture, Ames, IA, 50010, USA

<sup>3</sup>Department of Statistics and Probability, Michigan State University, East Lansing, MI, 48824, USA

Corresponding author: Sean Crosson

Email: [crosson4@msu.edu](mailto:crosson4@msu.edu)

**This PDF file includes:**

Figures S1 to S7  
Legend for Dataset S1  
SI References

**Other supplementary materials for this manuscript include the following:**

Datasets S1

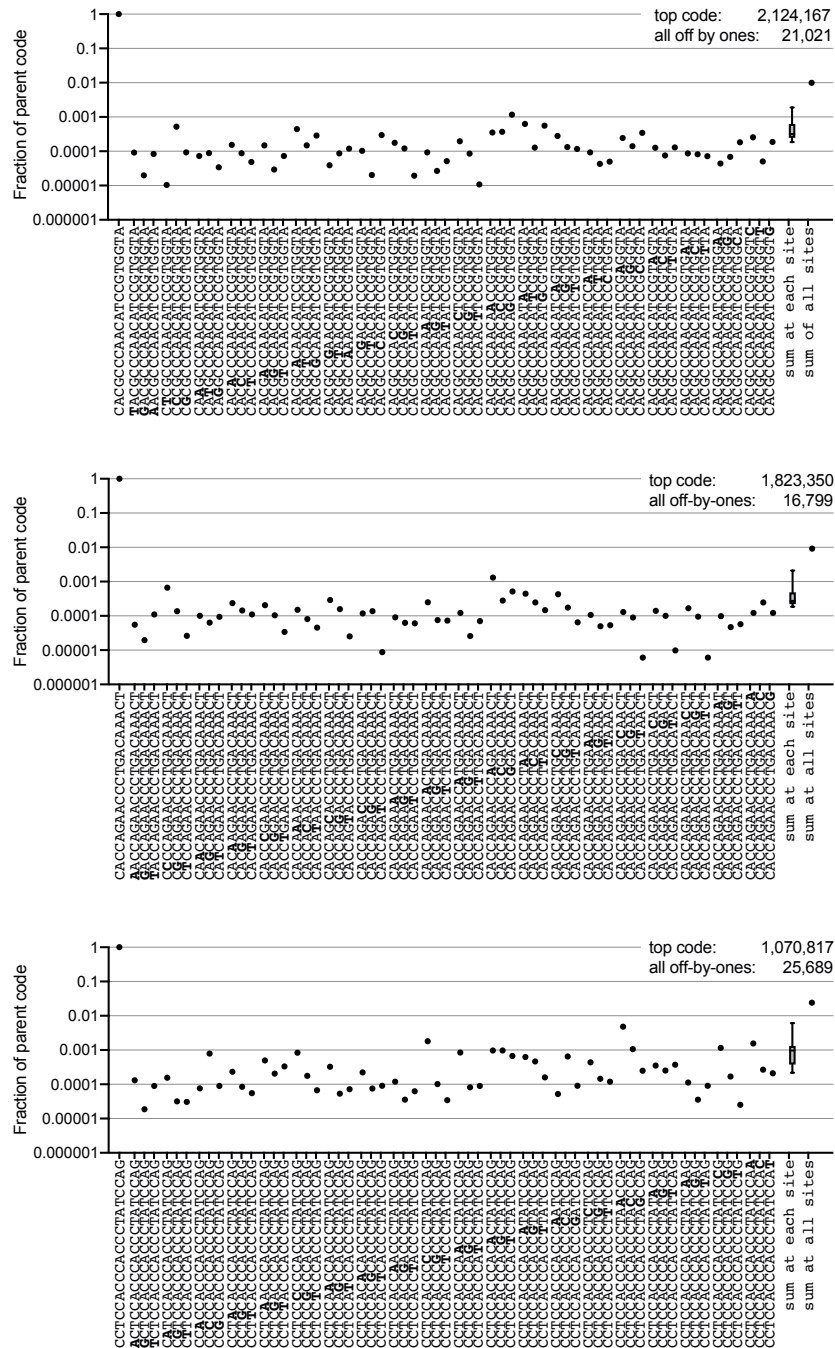

**Fig. S1. Abundant barcodes reveal sequencing error rate.**

Barcodes with one difference from the most abundant 20-bp barcode in three example samples: 1\_Left\_A, 4\_Right\_A and 5\_Right\_C (top to bottom). The abundant code is on the left, followed by each of the 60 possible 'off-by-one' codes with the changed base in bold. The fractional abundance of each code relative to the parent code is plotted. Box-plot represents the range and mean of the sum of three 'off-by-one' codes at each of the 20 sites. Finally, the sum of all 60 'off-by-one' codes is plotted. The number of reads corresponding to the abundant parent code and the 60 'off-by-one' codes is indicated at the top right of each plot.

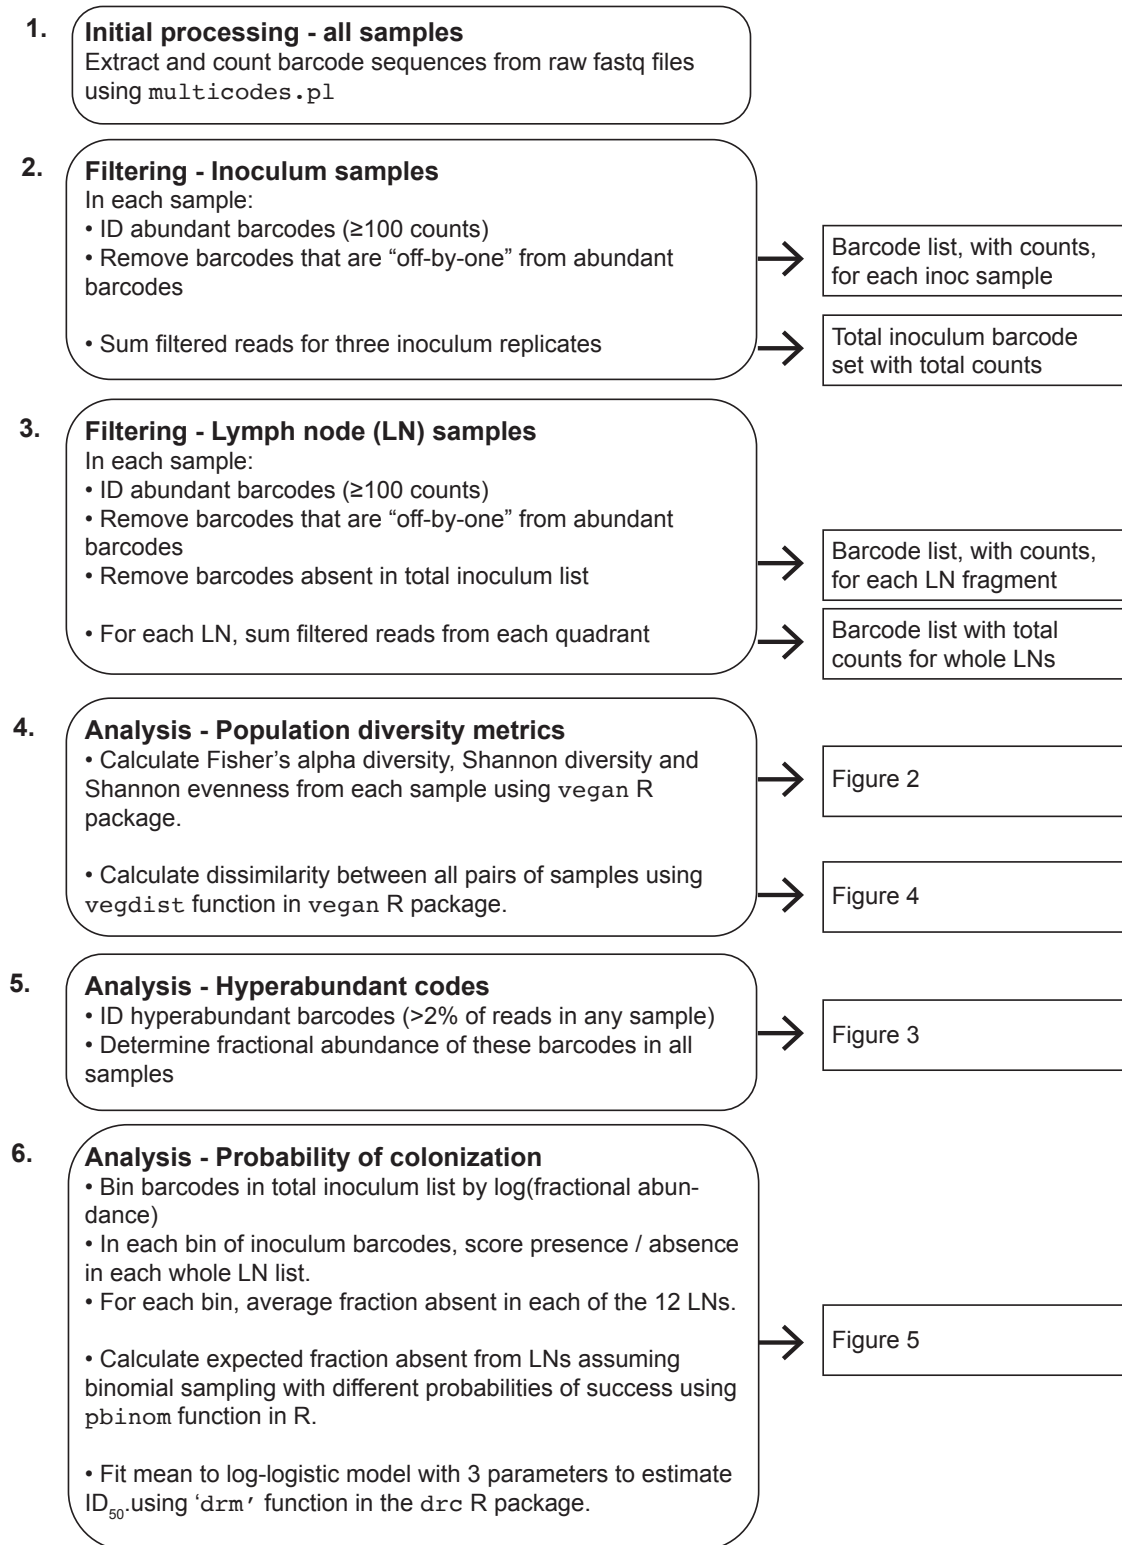

**Fig. S2. Sequence data processing procedure outlining filtering and analysis steps.** See Materials & Methods in main text for more details. The R scripts/code used in this analysis are available at GitHub ([https://github.com/amfiebig/Bruceella\\_barcode](https://github.com/amfiebig/Bruceella_barcode)).

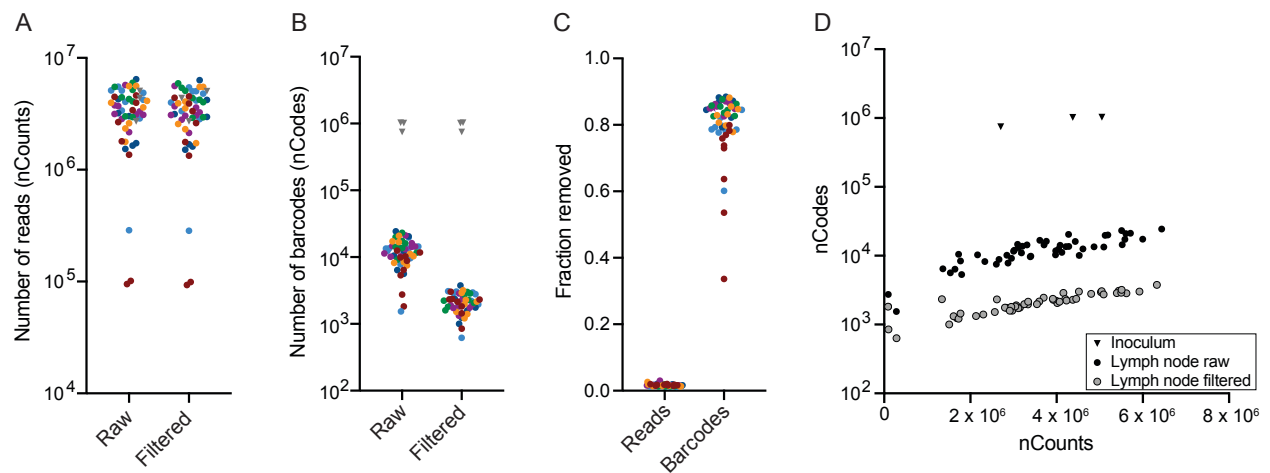

**Fig S3. Filtering to remove barcodes that are “off-by-one” from abundant ( $\geq 100$  counts) codes and absent in inoculum.**

**A.** Total number of barcode sequence reads and **B** unique barcodes in each sample before and after filtering. **C.** Fraction of reads and codes removed from each sample. Samples are color coded by animal (see main text). Inoculum samples are grey inverted triangles. **D.** Scatter plot of barcodes (nCodes) per read (nCounts) before (black circles) and after (grey circles) filtering for each lymph node sample. The change in inoculum replicates (inverted triangles) upon filtering is undetectable at this scale. See **Dataset S1** for underlying data from each sample.

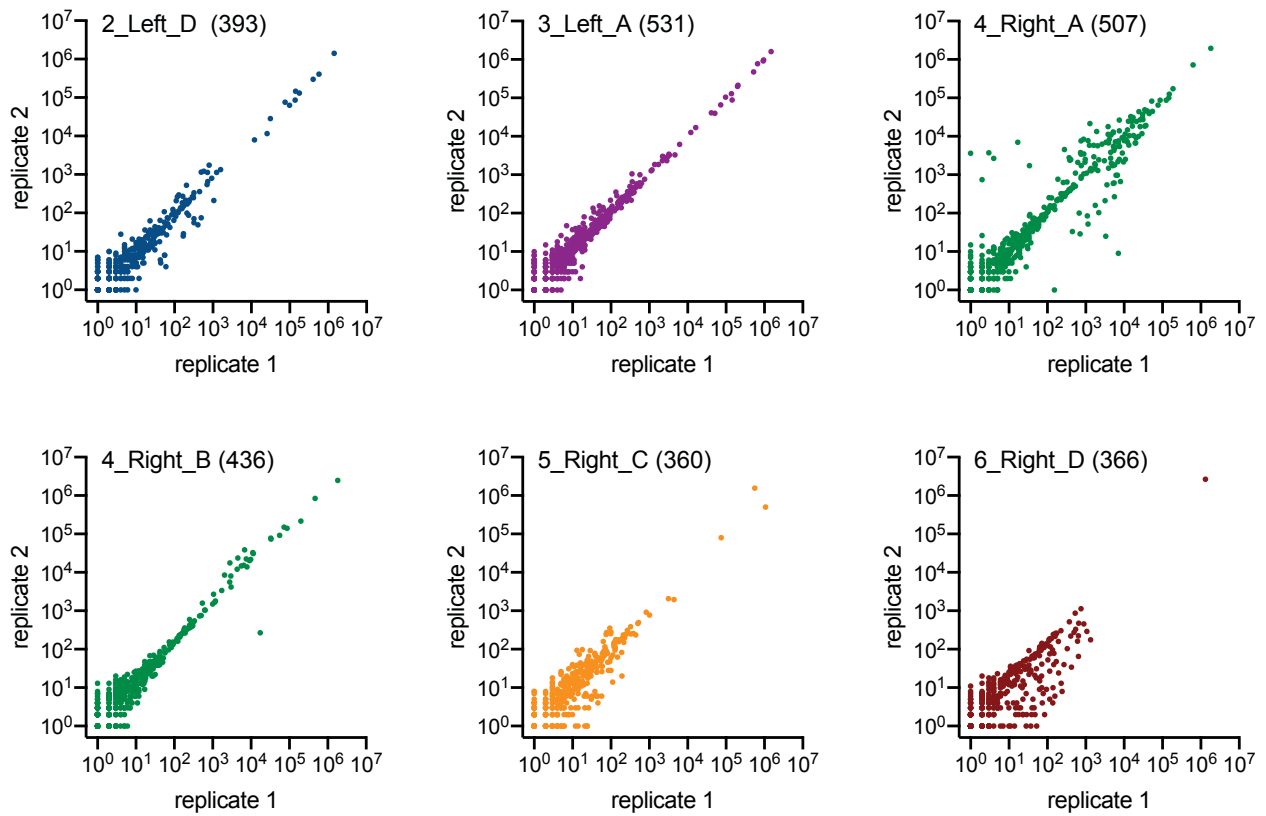

**Fig. S4: Abundant codes are highly correlated between replicates from the same lymph node samples.**

For a subset of samples (indicated in the top left of each graph), we extracted two genomic DNA samples from the harvested cells and independently amplified barcodes from each replicate. The number of reads corresponding to each barcode in the two replicates is plotted where each point corresponds to a barcode. The number of shared codes is indicated in parentheses. Replicate 1 was arbitrarily selected for all subsequent analysis in this work.

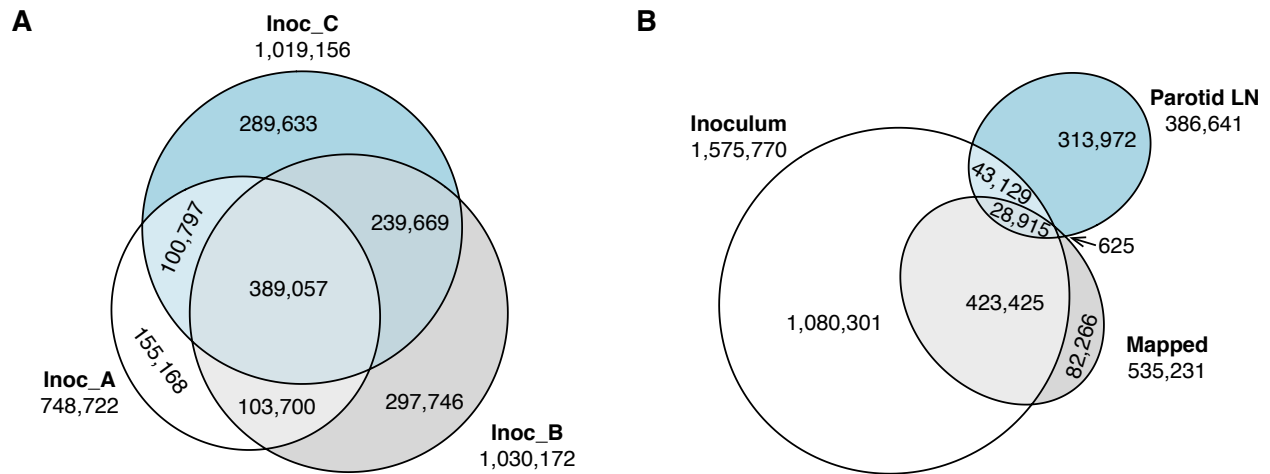

**Fig S5. *B. abortus* Tn-himar strain identity overlap.**

Each Tn-himar *B. abortus* strain in the pool used for animal infection (i.e. the inoculum) contains a unique 20 base pair barcode that can be used for strain identification. **A.** Proportional Euler diagram of the unique barcodes detected in each of the three replicate inoculum samples (A, B & C). The total number of codes detected in each replicate are indicated outside the circles. **B.** Proportional Euler diagram of the set of barcodes detected in the inoculum samples, the set of barcodes detected in parotid lymph node samples, and the set of barcodes previously mapped (1) with high confidence to positions in the *B. abortus* genome. The number of codes in each set are indicated outside the circles.

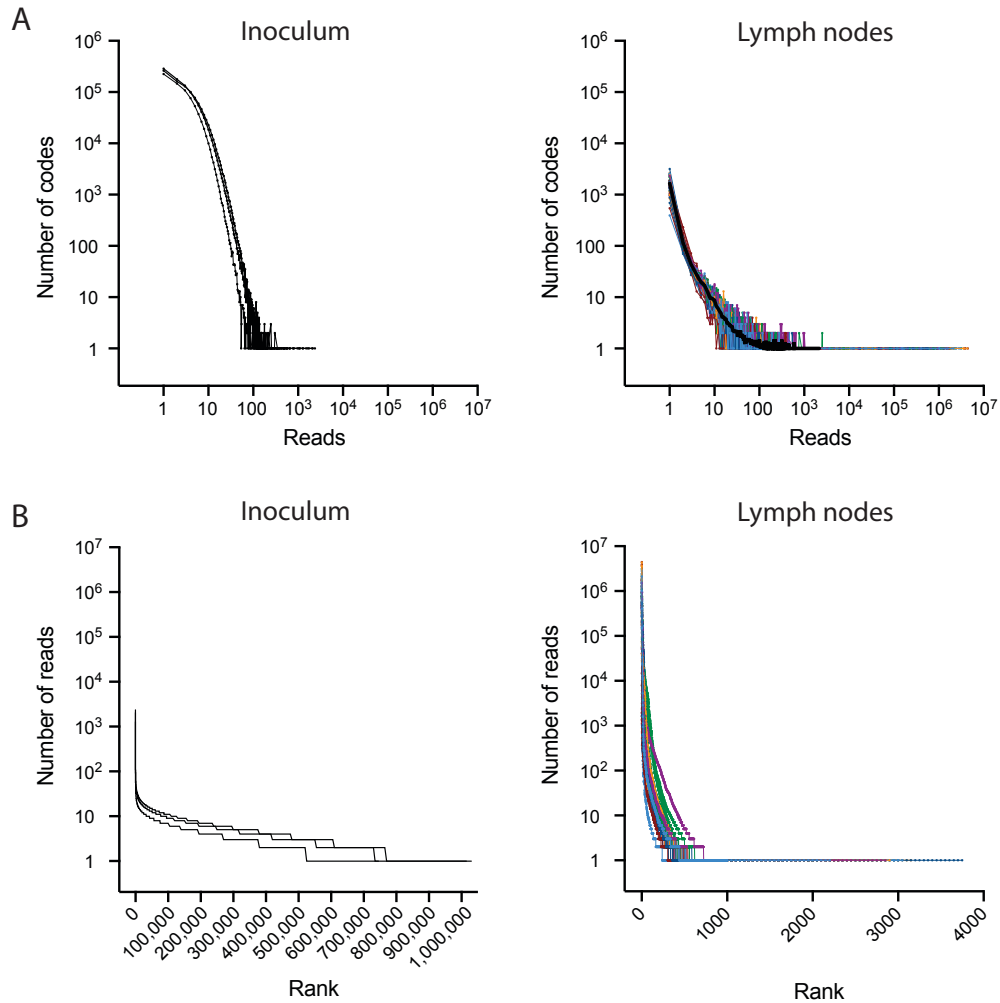

**Fig S6: *B. abortus* strain (i.e. barcode) abundance distributions in the inoculum and in bovine lymph nodes after conjunctival infection.**

**A.** Frequency of barcode abundances in each of the three inoculum replicates (left) and bovine lymph node samples (right). **B.** Ranked barcode abundance showing the number of Illumina sequencing reads corresponding to each barcode. Barcodes are ranked from most to least abundant in each inoculum sample (left) and lymph node sample (right). In all panels, each line represents the distribution in a single inoculum replicate or in a single lymph node quadrant. The lymph node samples are color coded by animal as in the main text. In (A), black line in lymph node plot represents an average of all lymph node samples.

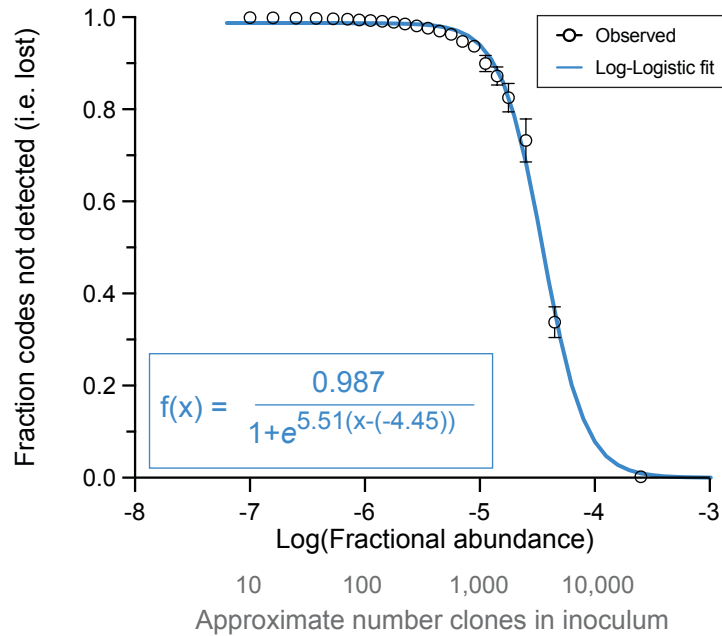

**Fig S7: Estimating infectious dose from abundance-dependent loss vs. colonization.**

Observed fraction of strains not detected in parotid lymph node samples (i.e. lost during infection) as a function of abundance in the inoculum (from Figure 5 in the main text) was fit to a log-logistic model with 3 parameters:  $f(x) = d/(1+\exp(b(\log(x)-\log(e))))$ . Here  $x$  and  $e$  are in log space, thus  $f(x) = d/(1+\exp(b(x-e)))$ . In this model,  $b$  relates to the steepness of the curve,  $d$  represents the upper asymptote and  $e$  denotes the effective dose ( $ED_{50}$ ), or in this case, the infectious dose ( $ID_{50}$ ) (2). The fit parameters are  $b = 5.51 \pm 0.30$   $p=5.9e^{-14}$ ;  $d = 0.987 \pm 0.004$   $p < 2.2e^{-16}$ ;  $e = -4.45 \pm 0.01$   $p < 2.2e^{-16}$ . Thus, the  $ID_{50}$  corresponds to a fractional abundance of  $10^{-4.45} = 3.5 \times 10^{-5}$  or approximately 3500 clones in our inoculating dose.



**Dataset S1 (see separate excel file): Basic sample parameters including number of reads and number of barcodes counted before and after filtering.**

See tab 1 for key to columns. See tab 2 for data.

~~~~~

## **SI References**

1. J. Herrou *et al.*, Periplasmic protein EipA determines envelope stress resistance and virulence in *Brucella abortus*. *Mol Microbiol* **111**, 637-661 (2019).
2. C. Ritz, F. Baty, J. C. Streibig, D. Gerhard, Dose-Response Analysis Using R. *PLoS One* **10**, e0146021 (2015).
